# Supplementary material
Source: ML conference proceedings conference paper supplement (https://proceedings.neurips.cc/paper_files/paper/2020/hash/f75526659f31040afeb61cb7133e4e6d-Abstract.html)

## 508 A Preliminaries

509 We list and prove a few elementary lemmas used in subsequent proofs and discussions.

510 **Lemma 4** Let  $n \geq m$ ,  $A \in \mathbb{R}^{m \times n}$  and  $b \in \mathbb{R}^m$  be such that  $\mathcal{S} = \{x \in \mathbb{R}^n : Ax = b\} \neq \emptyset$ . Let the  
 511 singular value decomposition (SVD) of  $A^\top$  be  $A^\top = U\Sigma V^\top$ , where  $U \in \mathbb{R}^{n \times r}$  and  $V \in \mathbb{R}^{m \times r}$  have  
 512 orthonormal columns,  $\Sigma = \text{Diag}(\sigma_1, \dots, \sigma_r)$ ,  $\sigma_1 \geq \dots \sigma_r > 0$ ,  $r = \text{rank}(A)$ . For any  $x \in \mathbb{R}^n$ , the  
 513 projection of  $x$  onto  $\mathcal{S}$  can be expressed as

$$\Pi_{\mathcal{S}}(x) = (I - UU^\top)x + U\Sigma^{-1}V^\top b.$$

514 In particular, when  $A$  has full rank,

$$\Pi_{\mathcal{S}}(x) = (I - A^\top(AA^\top)^{-1}A)x + A^\top(AA^\top)^{-1}b.$$

515

516 *Proof.* The case of full rank  $A$  is well-known, see, e.g., [54, Eq. (1)]. For general  $A$ ,  $Ax = b \Leftrightarrow$   
 517  $V\Sigma U^\top x = b$ . Recall that  $U$  and  $V$  consist of orthonormal columns and. Since  $V\Sigma$  has full column  
 518 rank, there exists a unique  $w \in \mathbb{R}^r$  such that  $V\Sigma w = b$ . In fact,  $w = \Sigma^{-1}V^\top b$ . Therefore,

$$Ax = b \Leftrightarrow U^\top x = \Sigma^{-1}V^\top b.$$

519 Since  $U^\top$  has full row rank, the formula follows directly from the full rank case.  $\square$

520 **Lemma 5** Under the same assumptions as Lemma 4, for any  $x \in \mathbb{R}^n$ , it holds that

$$\sigma_r \cdot \|x - \Pi_{\mathcal{S}}(x)\| \leq \|Ax - b\|.$$

521

522 *Proof.* By Lemma (4) and the fact that  $U$  and  $V$  have orthonormal columns,

$$\begin{aligned} \|x - \Pi_{\mathcal{S}}(x)\| &= \|U(U^\top x - \Sigma^{-1}V^\top b)\| = \|U^\top x - \Sigma^{-1}V^\top b\| \\ &= \|\Sigma^{-1}V^\top(Ax - b)\| \leq \|\Sigma^{-1}\| \|Ax - b\|, \end{aligned}$$

523 where  $\|\Sigma^{-1}\| = \frac{1}{\sigma_r}$ .  $\square$

524 **Lemma 6** For  $B > 0$  and  $g \in \mathbb{R}^d$ , let

$$x^* = \arg \min \left\{ \langle g, x \rangle + \sum_{i=1}^d x_i \log x_i : x \geq 0, \mathbf{1}^\top x = B \right\}.$$

525 Then,  $x_i^* = B \cdot \frac{e^{-g_i}}{\sum_{\ell} e^{-g_\ell}}$ ,  $i \in [d]$ .

526 *Proof.* It can be easily verified via KKT optimality conditions. The Lagrangian is

$$L(x, \lambda) = \langle g, x \rangle + \sum_i x_i \log x_i - \lambda(\mathbf{1}^\top x - B).$$

527 By the first-order condition, for any  $\lambda$ , the minimizer  $x(\lambda)$  of  $L(x, \lambda)$  has  $x_i(\lambda) = e^{\lambda-1-g_i}$ . Primal  
 528 feasibility implies  $\sum_i x_i(\lambda) = B \Rightarrow e^\lambda = \frac{B}{\sum_i e^{-(1+g_i)}}$ . Therefore,

$$x_i^* = B \cdot \frac{e^{-g_i}}{\sum_{\ell} e^{-g_\ell}}.$$

529  $\square$

### 530 A.1 Proof of Theorem 1

531 Consider the minimization form of (1). Let  $p_j \geq 0$  be the dual variable associated with constraint  
 532  $\sum_i x_{ij} \leq 1$ . The Lagrangian is

$$\mathcal{L}(x, p) = \left[ -\sum_i B_i \log u_i(x) + \left\langle p, \sum_i x_i \right\rangle - \sum_j p_j \right].$$

533 The Lagrangian dual is

$$\max_{p \geq 0} g(p) := \min_{x \geq 0} \mathcal{L}(x, p). \quad (8)$$

534 By assumption, there is a feasible  $x$  to (1) with  $u_i(x_i) > 0$  for all  $i$ . Note that  $x' = \frac{1}{2}x$  is also feasible  
 535 and  $u_i(x'_i) = \frac{1}{2}u_i(x_i) > 0$  by homogeneity of  $u_i$ . Consider  $x'' = x' + \delta$ , where  $\delta > 0$  is sufficiently  
 536 small so that  $\sum_i x''_{ij} < 1$  for all  $j$ . Then,  $x'' > 0$  and  $\sum_i x''_{ij} < 1$  for all  $j$ . Therefore, (1) has a  
 537 strictly feasible solution. Meanwhile, the dual (8) clearly has a strictly feasible solution  $p > 0$  with  
 538  $g(p) = \min_{x \geq 0} \mathcal{L}(x, p)$  finite. Therefore, strong duality holds by Slater's condition and the KKT  
 539 conditions are necessary and sufficient for (primal and dual) optimality of a solution pair  $(x, p)$  (see,  
 540 e.g., [7, Appendix D]). Let  $x^*$  and  $p^*$  be optimal solutions to the primal (1) and dual (8), respectively.  
 541 Clearly,  $u_i(x_i^*) > 0$  for all  $i$ . By Lagrange duality, we have

$$x^* \in \arg \min_{x \geq 0} \mathcal{L}(x, p^*).$$

542 In other words, each  $x_i^*$  maximizes  $r_i(x_i, p^*) := B_i \log u_i(x_i) - \langle p^*, x_i \rangle$  on  $x_i \geq 0$ . We show that  
 543  $(x^*, p^*)$  is a market equilibrium.

544 **Buyer optimality** First, we verify that  $\langle p^*, x_i^* \rangle = B_i$  for all  $i$ . Assume that  $\langle p^*, x_i^* \rangle > B_i$  for  
 545 some  $i$ . Let  $\tilde{x}_i = (1 - \epsilon)x_i^*$ , where  $0 \leq \epsilon < 1$ . Consider

$$\phi(\epsilon) = B_i \log u_i((1 - \epsilon)x_i^*) - \langle p^*, (1 - \epsilon)x_i^* \rangle = B_i \log u_i(x_i^*) - \langle p^*, x_i^* \rangle + B_i \log(1 - \epsilon) + \epsilon \langle p^*, x_i^* \rangle.$$

546 Note that  $\phi$  is differentiable on  $(0, 1)$  and  $\phi'(\epsilon) = -\frac{B_i}{1 - \epsilon} + \langle p^*, x_i^* \rangle$ . Since  $\langle p^*, x_i^* \rangle > B_i$ , we have  
 547  $\phi'(0) > 0$ . In other words, replacing  $x_i^*$  by  $\tilde{x}_i$  with sufficiently small  $\epsilon$  strictly decreases the value  
 548 of  $B_i \log u_i(x_i) - \langle p^*, x_i \rangle$ , contradicting to the choice of  $x^*$ . Therefore,  $\langle x^*, x_i^* \rangle \leq B_i$  for all  $i$ .  
 549 Completely analogously, we can also show that  $\langle p^*, x_i^* \rangle \geq B_i$  for all  $i$ . Therefore, for each buyer  $i$ ,  
 550  $x_i^*$  is feasible and depletes its budget  $B_i$  under prices  $p_i^*$ . Hence, for any  $x_i \in \mathbb{R}_+^m$ ,  $\langle p^*, x_i \rangle \leq B_i$ ,  
 551 since  $x_i^*$  maximizes  $r_i(\cdot, p^*)$ , we have

$$B_i \log u_i(x_i^*) - \langle p^*, x_i^* \rangle \geq B_i \log u_i(x_i) - \langle p^*, x_i \rangle.$$

552 Since  $\langle p^*, x_i \rangle \leq B_i = \langle p^*, x_i^* \rangle$ , the above implies

$$B_i \log u_i(x_i^*) \geq B_i \log u_i(x_i).$$

553 Therefore,  $u_i(x_i^*) \geq u_i(x_i)$ . In other words,  $x_i^* \in D_i(p^*)$  for all  $i$ .

554 **Market clearance** By the complementary slackness condition in Lagrange duality, for item  $j$  such  
 555 that  $\sum_i x_{ij}^* < 1$ , it must holds that  $p_j^* = 0$ , completing the proof.

556 **Remark** We can also assign any leftover of item  $j$  to any buyer  $i$  without violating its budget  
 557 constraint, in order to “clear” the market. Meanwhile, since  $u_i$  is CCNH, it is also “monotone” in the  
 558 following sense: for any  $\alpha \geq 0$ ,

$$u_i(x_i^* + \alpha e^j) \geq u_i(x_i^*) + \alpha u_i(e^j) \geq 0.$$

559 In other words, buyer  $i$ 's optimality is not affected by the assignment of any zero-price leftover.

### 560 A.2 Characterizations of Hoffman constant

561 We compare our definition of Hoffman constant and another common, explicit characterization.  
 562 Recall that  $H_{\mathcal{X}}(A)$  is the smallest  $H$  such that, for any  $b$ ,  $\mathcal{S} = \{x : Ax = b\}$ ,

$$\|x - \Pi_{\mathcal{X} \cap \mathcal{S}}(x)\| \leq H \|Ax - b\|, \quad \forall x \in \mathcal{X}.$$

563 For any matrix  $M$ , let  $\mathcal{B}(M)$  be the set of *nonsingular* submatrices consisting of rows of  $M$ . Define

$$H(M) = \max_{B \in \mathcal{B}(M)} \frac{1}{\sigma_{\min}(B)} < \infty. \quad (9)$$

564 The following fact is known (see, e.g., [34, §11.8] and [4, §2.1]).

565 **Lemma 7** *Suppose the reference polyhedral set can be represented by inequality constraints  $\mathcal{X} =$*   
 566  *$\{x : Cx \leq d\}$ . Then,*

$$H_{\mathcal{X}}(A) \leq H \left( \begin{bmatrix} A \\ C \end{bmatrix} \right).$$

567 Clearly,  $H(M)$  is finite for any  $M$ . In fact, this is the most well-known characterization of Hoffman  
 568 constant, and is tight in the following sense: let  $\mathcal{S} = \{x : Ax = b\}$  for some arbitrary right hand side  
 569  $b$ , then it is the smallest constant  $H$  such that

$$\|x - \Pi_{\mathcal{X} \cap \mathcal{S}}(x)\| \leq H \left\| \begin{bmatrix} Ax - b \\ (Cx - d)_+ \end{bmatrix} \right\|$$

570 for all  $x$  (not necessarily  $\in \mathcal{X}$ ). However, for all of our purposes, that is, analysis of PG,  $x$  is always  
 571 restricted to be  $\in \mathcal{X}$ . Therefore, we choose to define  $H_{\mathcal{X}}(A)$  as such, consistent with [5] and [53].  
 572 Meanwhile, the following is clear.

573 **Lemma 8** *For any matrices  $A \in \mathbb{R}^{m \times n}$ ,  $m \leq n$  and  $C \in \mathbb{R}^{\ell \times n}$ , it holds that*

$$H \left( \begin{bmatrix} A \\ C \end{bmatrix} \right) \geq \max \left\{ \frac{1}{\sigma_{\min}(A)}, H(A) \right\}.$$

574 *Proof.* By definition (9),  $H' := H \left( \begin{bmatrix} A \\ C^\top \end{bmatrix} \right) \geq H(A)$ . If  $\text{rank}(A) = m$ , then  $H' \geq \frac{1}{\sigma_{\min}(A)}$

575 because  $A \in \mathcal{B} \left( \begin{bmatrix} A \\ C \end{bmatrix} \right)$ . If  $r = \text{rank}(A) < m$ , let the (nonzero) singular values of  $A$  be  $\sigma_1 \geq \dots \geq$

576  $\sigma_r = \sigma_{\min}(A) > 0$ . Consider any  $B \in \mathcal{B}(A) \subseteq \mathcal{B} \left( \begin{bmatrix} A \\ C \end{bmatrix} \right)$  with rank  $r$  (having exactly  $r$  rows), let

577 its nonzero singular values be  $\sigma'_1 \geq \dots \geq \sigma'_r = \sigma_{\min}(B) > 0$ . Applying Cauchy's Interlacing  
 578 Theorem (see, e.g., [31, Theorem 1]) on  $AA^\top$  and its principal submatrix  $BB^\top$ , we have

$$\sigma_1 \geq \sigma'_1 \geq \dots \geq \sigma_r \geq \sigma'_r.$$

579 Therefore,  $H' \geq \frac{1}{\sigma_{\min}(B)} \geq \frac{1}{\sigma_{\min}(A)}$ . □

### 580 A.3 Proof of Theorem 2

581 We follow the development in [38, §4 & Appendix F] and further articulate the constants. There, the  
 582 authors show that proximal gradient achieves linear convergence under the so-called *Proximal-PL*  
 583 inequality. Consider the following general nonsmooth problem

$$F^* = \min_x F(x) = f(x) + g(x) \quad (10)$$

584 where  $f$  is smooth convex with  $L_f$ -Lipschitz continuous gradient,  $g$  is simple closed proper convex  
 585 and  $\text{dom } g \subseteq \text{dom } f$ . One iteration of the proximal gradient method with stepsize  $\gamma > 0$  is as  
 586 follows:

$$x^{t+1} = \text{Prox}_g(x^t - \gamma \nabla f(x^t)) = \arg \min_x \left[ \langle \gamma \nabla f(x), x - x^t \rangle + \frac{1}{2} \|x - x^t\|^2 + g(x) \right]. \quad (11)$$

587 For any  $\alpha > 0$  and any  $x \in \text{dom } g$ , define

$$\mathcal{D}(x, \alpha) = -2\alpha \min_{x'} \left[ \langle \nabla f(x), x' - x \rangle + \frac{\alpha}{2} \|x' - x\|^2 + g(x') - g(x) \right]. \quad (12)$$

588 Say that  $F = f + g$  satisfies the proximal-PŁ inequality at  $x$  w.r.t.  $\Lambda \geq \lambda > 0$  if

$$\frac{1}{2}\mathcal{D}(x, \Lambda) \geq \lambda(F(x) - F^*), \quad (13)$$

589 Below is essentially [38, Theorem 5], which shows that the so-called Proximal-PŁ condition is  
 590 sufficient for linear convergence. Note that, different from [38, Theorem 5], we only require (13) to  
 591 hold for  $x \in \mathcal{X}$  such that  $F(x) \leq F(x^0)$  instead of all  $x \in \mathcal{X}$ . In addition, we note that in some  
 592 cases (13) may hold with  $\Lambda > L_f$ , in which case the rate needs to be slightly adjusted. Since  $\mathcal{D}(x, \cdot)$   
 593 is monotone [38, Lemma 1], (13) holds when  $\Gamma$  is replaced by  $\Gamma' \geq \Gamma$ . The statement and proof are  
 594 the same as [38, pp. 9] otherwise.

595 **Theorem 9** *Let  $x^0 \in \text{dom } g$ . If  $f$  and  $g$  satisfies (13) for all  $x \in \text{dom } g$  such that  $F(x) \leq F(x^0)$ ,  
 596 then  $x^t$  defined by (11) starting from  $x^0$  with constant stepsize  $\gamma = 1/L_f$  converges linearly with  
 597 rate  $1 - \frac{\lambda}{\bar{L}}$ , where  $\bar{L} = \max\{\Lambda, L_f\}$ . In other words,*

$$F(x^t) - F^* \leq \left(1 - \frac{\lambda}{\bar{L}}\right)^t (F(x^0) - F^*), \quad t = 1, 2, \dots$$

598

599 *Proof.* By assumption, (13) holds for all  $x \in \text{dom } g$ ,  $x \leq F(x^0)$ . In particular, it holds for  $x^t$ ,  
 600  $t = 1, 2, \dots$ , since proximal gradient is a descent method, i.e.,  $F(x^0) \geq F(x^1) \geq \dots$  (see, e.g., [3,  
 601 Corollary 10.18]). Therefore, by  $L_f$ -Lipschitz continuity of  $\nabla f$ , proximal gradient update (11),  
 602 definition of  $\mathcal{D}(x, \cdot)$ , its monotonicity, and (13) for all  $x^t$ ,

$$\begin{aligned} F(x^{t+1}) &\leq F(x^t) + \langle \nabla f(x^t), x^{t+1} - x^t \rangle + \frac{L_f}{2} \|x^{t+1} - x^t\|^2 + g(x^{t+1}) - g(x^t) \\ &\leq F(x^t) + \left[ \langle \nabla f(x^t), x^{t+1} - x^t \rangle + \frac{\bar{L}}{2} \|x^{t+1} - x^t\|^2 + g(x^{t+1}) - g(x^t) \right] \\ &\leq F(x^t) - \frac{1}{2\bar{L}} \mathcal{D}(x^t, \bar{L}) \\ &\leq F(x^t) - \frac{\lambda}{\bar{L}} (F(x^t) - F^*) \\ \Rightarrow F(x^{t+1}) - F^* &\leq \left(1 - \frac{\lambda}{\bar{L}}\right) (F(x^t) - F^*). \end{aligned}$$

603 Repeatedly applying the above inequality completes the proof.  $\square$

604 Then, we prove Theorem 2. Clearly, problem (2) is (10) with  $g(x) = \delta_{\mathcal{X}}(x)$  and PG is a special  
 605 case of proximal gradient. By Theorem 9, in order to prove Theorem 2, it suffices to establish the  
 606 Proximal-PŁ condition (13) (for all  $x \in \mathcal{X}$ ,  $f(x) \leq f(x^0)$  for some initial iterate  $x^0$ ). Let  $\mathcal{X}^*$  be the  
 607 set of optimal solutions to (2) and  $f^*$  be the optimal objective value. Since  $h$  is  $\mu$ -strongly convex and  
 608  $f(x) = h(Ax)$ , there exists  $z^* \in \text{dom } f$  such that  $\mathcal{S} = \{x : Ax = z^*\}$  and  $\mathcal{X}^* = \mathcal{X} \cap \mathcal{S}$ . Therefore,  
 609 for any  $x \in \mathcal{X}$ ,  $x_p := \Pi_{\mathcal{X}^*}(x)$ , we have

$$f(x_p) = h(Ax_p) \geq h(Ax) + \langle \nabla h(Ax), Ax_p - x \rangle + \frac{\mu}{2} \|Ax_p - x\|^2.$$

610 Note that

$$\langle \nabla h(Ax), Ax_p - x \rangle = \langle A^\top \nabla h(Ax), x_p - x \rangle = \langle \nabla f(x), x_p - x \rangle.$$

611 Hence, for any  $x \in \mathcal{X}$ , by strong convexity of  $h$  and definition of  $H = H_{\mathcal{X}}(A)$ , we have

$$\begin{aligned} f(x_p) &\geq f(x) + \langle \nabla f(x), x_p - x \rangle + \frac{\mu}{2} \|A(x - x_p)\|^2 \\ &= f(x) + \langle \nabla f(x), x_p - x \rangle + \frac{\mu}{2} \|Ax - z^*\|^2 \\ &\geq f(x) + \langle \nabla f(x), x_p - x \rangle + \frac{\mu}{2H^2} \|x - x_p\|^2, \end{aligned}$$

612 Therefore,

$$\begin{aligned}
f^* &\geq f(x) + \langle \nabla f(x), x_p - x \rangle + \frac{\mu}{2H^2} \|x - x_p\|^2 \\
&\geq f(x) + \min_{y \in \mathcal{X}} \left\{ \langle \nabla f(x), y - x \rangle + \frac{\mu}{2H^2} \|y - x\|^2 \right\} \\
&\geq f(x) - \frac{H^2}{2\mu} \mathcal{D}\left(x, \frac{\mu}{H^2}\right) \\
&\Rightarrow \frac{1}{2} \mathcal{D}\left(x, \frac{\mu}{H^2}\right) \geq \frac{\mu}{H^2} (f(x) - f^*).
\end{aligned}$$

613 Thus, (13) holds for all  $x \in \mathcal{X}$ ,  $f(x) \leq f(x^0)$  with

$$\Lambda = \lambda = \frac{\mu}{H^2}.$$

614 Since  $\nabla f(x) = A^\top \nabla h(Ax)$  and  $h$  is  $(\mu, L)$ -s.c., its Lipschitz constant can be chosen as

$$L_f = L\|A\|^2.$$

615 By Theorem 9, PG with stepsize  $\gamma = \frac{1}{L_f}$  converges linearly with rate

$$1 - \frac{\frac{\mu}{H^2}}{\max\left\{\frac{\mu}{H^2}, L\|A\|^2\right\}} = 1 - \frac{\mu}{\max\{\mu, LH^2\|A\|^2\}}.$$

616 Finally, convergence of the distance to optimality  $\|x^t - \Pi_{\mathcal{X}}(x^t)\|$  is straightforward: for any  $x \in \mathcal{X}$ ,  
617 by the strong convexity of  $h$  and definition of  $H$ ,

$$f(x) - f^* = h(Ax) - h(Ax_p) \geq \frac{\mu}{2} \|Ax - Ax_p\|^2 = \frac{\mu}{2} \|Ax - z^*\|^2 \geq \frac{\mu}{2H} \|x - x_p\|^2.$$

618 □

619 **Remark** A special case is when  $d \geq r$  (recall that  $A \in \mathbb{R}^{d \times r}$ ) and  $\text{rank}(A) = r$ . In this case,  
620  $f(x) = h(Ax)$  itself is strongly convex with modulus  $\mu\sigma_{\min}(A)^2$ . In this case, classical analysis (e.g.,  
621 [3, §10.6]) implies linear convergence with rate  $1 - \frac{\mu\sigma_{\min}(A)^2}{L\|A\|^2}$ . Meanwhile, in the above analysis, we  
622 have  $\mathcal{X}^* = \{x^*\} = \mathcal{S} = \{x : Ax = z^*\} = \mathcal{X} \cap \mathcal{S}$  (since  $x^*, z^*$  are unique and  $\text{rank}(A) = r$ ). By  
623 Lemma 5, for any  $x$ , it holds that

$$\|x - \Pi_{\mathcal{X}^*}(x)\| \leq \frac{1}{\sigma_{\min}(A)^2} \|Ax - z^*\|.$$

624 Therefore, by the definition of Hoffman constant,  $H_{\mathcal{X}}(A) \leq \frac{1}{\sigma_{\min}(A)^2}$  and the classical rate under  
625 strong convexity is recovered.

#### 626 A.4 Proof of Theorem 3

627 Let  $\mathcal{X}^*$  be the set of optimal solutions to (2). First, recall the following lemma [64, Lemma 14],  
628 which ensures the first part of the theorem, that is, uniqueness of  $Ax^*$  and  $q^\top x^*$  for all  $x^* \in \mathcal{X}^*$ .

629 **Lemma 9** *There exist unique  $z^* \in \mathbb{R}^r$  and  $w^* \in \mathbb{R}$  such that for any  $x^* \in \mathcal{X}^*$ ,*

$$Ax^* = z^*, \quad \langle q^*, x^* \rangle = w^*.$$

630

631 The next lemma is essentially [4, Lemma 2.5]. Different from the statement of [4, Lemma 2.5],  
632 we keep  $\|\nabla h(z^*)\|$  instead of bounding it by  $\sup_{x \in \mathcal{X}} \|\nabla h(Ax)\|$ . We also define  $C = f(x^0) - f^*$   
633 instead of  $C = \sup_{x \in \mathcal{X}} f(x) - f^*$ , since subsequent application of the lemma only involves PG  
634 iterates  $x^t$ , which have monotone decreasing objective values  $f(x^0) \geq f(x^1) \geq \dots$ . The proof  
635 remains unchanged otherwise.

636 **Lemma 10** Let  $z^*$  be as in Lemma 9 and  $x^0 \in \mathcal{X}$ . For any  $x \in \mathcal{X}$  such that  $f(x) \leq f(x^0)$ , it holds  
637 that

$$\|x - \Pi_{\mathcal{X}^*}(x)\|^2 \leq \kappa(f(x) - f^*),$$

638 where, same as in Theorem 3,  $\kappa = H_{\mathcal{X}}(A)^2 \left( C + 2GD_A + \frac{2(G^2+1)}{\mu} \right)$ ,  $C = f(x^0) - f^*$ ,  
639  $G = \|\nabla h(z^*)\|$ ,  $D_A = \sup_{x,y \in \mathcal{X}} \|A(x-y)\|$ .

640 Finally, take  $L_f = L\|A\|^2$  as a Lipschitz constant of  $\nabla f$ . By Lemma 10 and [38, §4.1], it holds that  
641 (2) satisfies the proximal-PŁ inequality (13) with

$$\Lambda = \lambda = \frac{1}{2\kappa}$$

642 for all  $x \in \mathcal{X}$  such that  $f(x) \leq f(x^0)$  (in particular, for all  $x^t$ ,  $t = 1, 2, \dots$ ). By Theorem 9, PG  
643 converges linearly with rate  $1 - \frac{\lambda}{\max\{\Lambda, L_f\}} = 1 - \frac{1}{\max\{1, 2\kappa L\|A\|^2\}}$ .

644 **Remark** Lemma 10 shows that QG holds. Similar convergence guarantees can also be derived  
645 from other QG-based analysis, e.g., [27, Corollary 3.7].

## 646 A.5 Linear convergence of PG with linesearch

647 First, we consider the more general proximal gradient setup (10). Let  $L_f$  be a Lipschitz constant  
648 of  $\nabla f$  and the Proximal-PŁ inequality 13 holds with  $\Lambda \geq \lambda \geq 0$  for all  $x \in \text{dom } g$  such that  
649  $F(x) \leq F(x^0)$ . Let  $\alpha \geq 1$ ,  $\beta \in (0, 1)$ ,  $\Gamma > 0$  (increment factor, decrement factor, upper bound on  
650 stepsize, respectively). The linesearch subroutine  $\mathcal{LS}_{\alpha, \beta, \Gamma}$  is defined in Algorithm 1.

---

**Algorithm 1**  $x_{t+1}, \gamma_t, k_t \leftarrow \mathcal{LS}_{\alpha, \beta, \Gamma}(x, \gamma, k_{\text{prev}})$  with parameters  $\alpha \geq 1, \beta \in (0, 1), \Gamma > 0$ .

---

If  $k_{\text{prev}} = 0$ , set  $\gamma^{(0)} = \min\{\alpha\gamma, \Gamma\}$ . Otherwise, set  $\gamma^{(0)} = \gamma$ .

For  $k = 0, 1, 2, \dots$

1. Compute  $x^{(k)} = \text{Prox}_{\lambda^{(k)}g}(x - \gamma^{(k)}\nabla f(x))$ .
2. Break if

$$f(x^{(k)}) \leq f(x) + \langle \nabla f(x), x^{(k)} - x \rangle + \frac{1}{2\gamma^{(k)}} \|x^{(k)} - x\|^2. \quad (14)$$

3. Set  $\gamma^{(k+1)} = \beta\gamma^{(k)}$  and continue to  $k+1$ .

Return  $x_{t+1} = x^{(k)}, \gamma_t = \gamma^{(k)}, k_t = k$ .

---

651 In this way, proximal gradient with linesearch can be described formally as follows: starting from  
652  $x^0 \in \text{dom } f$ ,  $\gamma_{-1} = \Gamma$ ,  $k_{-1} = 0$ , perform the following iterations

$$(x^{t+1}, \gamma_t, k_t) \leftarrow \mathcal{LS}_{\alpha, \beta, \Gamma}(x^t, \gamma_{t-1}, k_{t-1}), \quad t = 1, 2, \dots$$

653 Note that (14) holds for any  $\gamma^{(k)} \leq \frac{1}{L_f}$  (see, e.g., [3, Theorem 10.16]). Therefore, Algorithm 1  
654 terminates when  $\gamma^{(0)}\beta^k \leq \frac{1}{L_f}$ . This means

$$\gamma_t \geq \tilde{\gamma} := \min \left\{ \Gamma, \frac{\beta}{L_f} \right\}. \quad (15)$$

655 for all  $t$ . Note that we explicitly include the case of  $\Gamma \leq \frac{1}{L_f}$ , although in practice  $\Gamma$  is often set very  
656 large. Clearly,

$$\Gamma\beta^k \leq \tilde{\gamma} \Leftrightarrow k \geq \frac{\log \frac{\Gamma}{\tilde{\gamma}}}{\log \frac{1}{\beta}}.$$

657 Therefore, in Algorithm 1, the backtracking iteration index satisfies  $k_t \leq \frac{\log \frac{\Gamma}{\tilde{\gamma}}}{\log \frac{1}{\beta}}$  for all  $t$ . Note that if  
658 the loop breaks at  $k_t$ , the number of Prox evaluations is exactly  $k_t + 1$ .

659 Let

$$\bar{L} = \max \left\{ \frac{1}{\bar{\gamma}}, \Lambda \right\} = \max \left\{ \frac{1}{\Gamma}, \frac{L_f}{\beta}, \Lambda \right\}. \quad (16)$$

660 Then, monotonicity of  $D(x, \cdot)$  implies, for all  $x \in \text{dom } g$  such that  $F(x) \leq F(x^0)$ ,

$$\frac{1}{2} \mathcal{D}(x, \bar{L}) \geq \frac{1}{2} \mathcal{D}(x, \Lambda) \geq \lambda (F(x) - F^*).$$

661 Following the proof of Theorem 9 (or that of [38, Theorem 5]), we have

$$\begin{aligned} F(x^{t+1}) &\leq F(x^t) + \langle \nabla f(x^t), x^{t+1} - x^t \rangle + \frac{L_f}{2} \|x^{t+1} - x^t\|^2 + g(x^{t+1}) - g(x^t) \\ &\leq F(x^t) + \langle \nabla f(x^t), x^{t+1} - x^t \rangle + \frac{\bar{L}}{2} \|x^{t+1} - x^t\|^2 + g(x^{t+1}) - g(x^t) \\ &\leq F(x^t) - \frac{1}{2\bar{L}} \mathcal{D}(x^t, \bar{L}) \\ &\leq F(x^t) - \frac{\lambda}{\bar{L}} (F(x^t) - F^*) \\ &\Rightarrow F(x^{t+1}) - F^* \leq \left(1 - \frac{\lambda}{\bar{L}}\right) (F(x^t) - F^*). \end{aligned}$$

662 Summarizing the above discussion, we have the following convergence guarantee for PG with  
663 linesearch.

664 **Theorem 10** Let  $\alpha \geq 1$ ,  $\beta \in (0, 1)$  and  $\Gamma > 0$ . For problem (10) satisfying the Proximal-  
665 PLinequality with  $\Lambda \geq \lambda > 0$  for all  $x \in \text{dom } g$  such that  $F(x) \leq F(x^0)$ , proximal gradient  
666 (11) with linesearch subroutine  $\mathcal{LS}_{\alpha, \beta, \Gamma}$  described in Algorithm 1 generates iterates  $x^t$  such that

$$F(x^{t+1}) - F^* \leq \left(1 - \frac{\lambda}{\bar{L}}\right)^t (F(x^0) - F^*), \quad t = 1, 2, \dots, \quad (17)$$

667 where  $\bar{L}$  is defined in (16). Furthermore, each iteration requires at most  $1 + \frac{\log \frac{\Gamma}{\bar{\gamma}}}{\log \frac{1}{\beta}}$  number of Prox  
668 evaluations.

669 *Proof of Theorem 4.* In the above discussion, when  $g(x) = \delta_{\mathcal{X}}(x)$ , we can replace the Lipschitz  
670 constant  $L_f$  by the restricted one  $L_f^{\mathcal{X}}$  throughout, since Algorithm 1 ensures  $x^t \in \mathcal{X}$  for all  $t$ . It  
671 remains to apply Theorem 10. For  $q = 0$ ,  $\Lambda = \lambda = \frac{\mu}{H^2}$  and  $\bar{L} = \max \left\{ \frac{1}{\Gamma}, \frac{L_f^{\mathcal{X}}}{\beta}, \frac{\mu}{H^2} \right\}$ . Therefore, the  
672 rate is

$$1 - \frac{\lambda}{\bar{L}} = 1 - \frac{\mu}{\max\{\mu, H^2/\Gamma, H^2 L_f^{\mathcal{X}}/\beta\}}.$$

673 For  $q \neq 0$ ,  $\Lambda = \lambda = \frac{1}{2\kappa}$  and  $\bar{L} = \max \left\{ \frac{1}{\Gamma}, \frac{L_f^{\mathcal{X}}}{\beta}, \frac{1}{2\kappa} \right\}$ . Therefore, the rate is

$$1 - \frac{1}{\max\{1, 2\kappa L_f^{\mathcal{X}}/\beta, 2\kappa/\Gamma\}}.$$

674

□

## 675 A.6 Other utility functions

676 Recall that, by Theorem (1), for any CCNH utilities  $u_i$ , optimal solutions to the EG convex program  
677 (1) correspond to equilibrium allocation and prices.

678 **CES utilities** are parametrized by a nondegenerate  $v$  and exponent  $\rho \in (-\infty, 1] \setminus \{0\}$ :

$$u_i(x_i) = \left( \sum_{j=1}^m v_{ij} x_{ij}^{\rho} \right)^{1/\rho}.$$

Clearly,  $\rho = 1$  gives linear utilities. For  $\rho < 1$ , it has been shown that Proportional Response dynamics achieves linear convergence in prices and utilities [67, Theorem 4] under their notion of  $\epsilon$ -approximate market equilibrium [67, pp. 2693].

**Cobb-Douglas utilities** represent substitutive items and take the following form, for parameters  $\lambda = (\lambda_i), \lambda_i \in \Delta_m$ :

$$u_i(x_i) = \prod_j x_{ij}^{\lambda_{ij}}.$$

In this case, EG (1) decomposes item-wise into simple problems with explicit solutions. Specifically, for each item  $j$ , the minimization problem is

$$\min_{x_{:,j} \in \Delta_n} - \sum_i B_i \lambda_{ij} \log x_{ij}.$$

Let  $p_j$  be the Lagrangian multiplier associated with constraint  $\sum_i x_{ij} = 1$ . The Lagrangian is

$$\mathcal{L}(x_{:,j}, p_j) = - \sum_i B_i \lambda_{ij} \log x_{ij} + p_j \left( \sum_i x_{ij} - 1 \right).$$

By first-order stationarity condition, for any  $p_j \in \mathbb{R}$ ,  $\mathcal{L}(x_{:,j}, p_j)$  is minimized when

$$x_{ij} = \frac{B_i \lambda_{ij}}{p_j}. \quad (18)$$

Substituting it into  $\mathcal{L}$  and discarding the constants w.r.t.  $p_j$ , we have

$$g(p_j) = \left( \sum_i B_i \lambda_{ij} \right) \log p_j - p_j,$$

which is maximized at equilibrium prices

$$p_j^* = \sum_i B_i \lambda_{ij}.$$

Therefore, by 18, the equilibrium  $x^*$  under Cobb-Douglas utilities is given by

$$x_{ij}^* = \frac{B_i \lambda_{ij}}{\sum_i B_i \lambda_{ij}}, \forall i, j.$$

## B Linear utilities

### B.1 Shmyrev's convex program

Under linear utilities, it turns out that we can also compute market equilibrium via the following convex program due to Shmyrev [58, 8]. In this convex program, the variables are the *bids*  $b_{ij}, i \in [n], j \in [m]$  and prices  $p_j, j \in [m]$ .

$$\max \sum_{i,j} b_{ij} \log v_{ij} - \sum_j p_j \log p_j \quad \text{s.t.} \quad \sum_i b_{ij} = p_j, j \in [m], \sum_j b_{ij} = B_i, i \in [n], b \geq 0. \quad (19)$$

Given an optimal solution  $b^*$ , equilibrium prices and allocations are then given by  $p_j^* = \sum_i b_{ij}^*$  and

$x_{ij}^* = \frac{b_{ij}^*}{p_j^*}$ , respectively.

### B.2 Proof of Lemma 1

Any  $x \in \mathcal{X}$  satisfies  $x \leq 1$ . Therefore,  $\langle v_i, x_i \rangle \leq \|v_i\|_1 \|x_i^*\|_\infty \leq \|v_i\|_1 = \bar{u}_i$ . For the lower bound, recall that at an equilibrium allocation  $x^*$  ensures that every buyer gets at least the utility of the proportional share, that is,

$$\langle v_i, x_i^* \rangle \geq \left\langle v_i, \frac{B_i}{\|B\|_1} \mathbf{1} \right\rangle = \frac{B_i \|v_i\|_1}{\|B\|_1} = u_i.$$

### 702 B.3 Uniqueness of equilibrium quantities and convergence of $u^t, p^t$

703 Convergence of  $u^t$  to  $u^*$  can be easily seen as follows. Let  $x^t$  be the PG iterates and  $\tilde{h}, A, f = \tilde{h}(Ax)$ ,  
 704  $\mu$  be defined as in §3 and  $f^* = \min_{x \in \mathcal{X}} f(x)$ . Since  $\tilde{h}$  is  $\mu$ -strongly convex, we have

$$\frac{\mu}{2} \|u^t - u^*\|^2 \leq \tilde{h}(u^t) - \tilde{h}(u^*) \leq \tilde{h}(Ax^t) - f^*,$$

705 which converges linearly. Next, we show uniqueness of  $p^*$  via simple arguments and construct a  
 706 sequence of linearly convergent prices  $p^t$ .

707 **Lemma 11** *Assume that  $v$  is nondegenerate. Then, the equilibrium prices  $p^*$  under linear utilities*  
 708 *are unique.*

709 *Proof.* By Theorem 1 and [21, Lemma 3],  $p^*$  is an optimal solution (together with some  $\beta^*$ ) to the  
 710 following problem (dual of (1) with linear utilities):  $\square$

$$\min_{p, \beta} \sum_j p_j - \sum_i B_i \log \beta_i \quad \text{s.t. } p \geq 0, \beta \geq 0, p_j \geq v_{ij} \beta_i, \forall i, j. \quad (20)$$

711 Here, strong duality holds since there clearly exist primal and dual strictly feasible solutions with  
 712 finite objective values given nondegenerate  $v$  (c.f. Theorem 1 and Appendix A.1). We can eliminate  
 713  $p$  by letting  $p_j = \max_i v_{ij} \beta_i$  for all  $j$  and rewrite (20) as

$$\min_{\beta} \sum_j \max_i v_{ij} \beta_j - \sum_i B_i \log \beta_i \quad \text{s.t. } \beta \geq 0.$$

714 In the above, since the objective is strongly convex and the feasible region is  $\beta \geq 0$ , the optimal  
 715 solution  $\beta^*$  is clearly unique. Furthermore, it must hold that  $\beta^* > 0$  (since the optimal objective  
 716 value is finite and strong duality holds). For  $p^*$  optimal to (20), it must hold that  $p_j^* = \max_i v_{ij} \beta_i^*$ .  
 717 In fact,  $p_j^* \geq \max_i v_{ij} \beta_i^*$  by feasibility and, for any strict inequality, decreasing the corresponding  $p_j^*$   
 718 strictly decreases the objective.  $\square$

719 The following lemma provides simple upper and lower bounds on feasible and equilibrium prices,  
 720 respectively. The lower bounds are slightly strengthened over the existing one [8, Lemma 17].

721 **Lemma 12** *Let  $p^*$  be equilibrium prices under linear utilities with nondegenerate valuations  $v$ . Then,*  
 722  *$\underline{p}_j \leq p_j^* \leq \bar{p}_j$  for all  $j$ , where  $\underline{p}_j = \max_i \frac{v_{ij} B_i}{\|v_i\|_1}$  and  $\bar{p}_j = \|B\|_1$ .*

723 *Proof.* It is essentially the same as the proof of Lemma 2, except that, at optimality,  $u_i \leq \|v_i\|_1 + B_i$   
 724 can be strengthened to  $u_i \leq \|v_i\|_1$  (utility of each buyer is at most that of having a unit of every item).  
 725  $\square$

726 **A linearly convergent sequence of  $p^t$**  Here, all norms are vector norms. Note that each step of PG  
 727 is of the form  $x^{t+1} = \Pi_{\mathcal{X}}(\tilde{x}^t)$ , where  $\tilde{x}^t = x^t - \gamma \nabla f(x^t)$ . Since  $\nabla f$  is  $L_f$ -Lipschitz, the mapping

$$\phi_1 : x \mapsto x - \gamma \nabla f(x^t)$$

728 is Lipschitz continuous (w.r.t.  $\|\cdot\|_2$ ) with constant  $1 + \gamma L_f = 2$  (where  $\gamma = \frac{1}{L\|A\|^2}$  is the fixed  
 729 stepsize). Meanwhile, we have the following.

730 **Lemma 13** *Let  $y \in \mathbb{R}^n$  and  $y^* = \Pi_{\Delta^n}(y)$ . There exists a unique multiplier  $\lambda \in \mathbb{R}$ , which can be*  
 731 *computed in  $O(n \log n)$  time, such that*

$$\sum_{i=1}^n (y_i - \lambda)_+ = 1. \quad (21)$$

732 *Moreover, the mapping  $\phi_2 : y \mapsto \lambda$  is piecewise linear and 1-Lipschitz continuous w.r.t.  $\|\cdot\|_1$ .*

733 *Proof.* By the KKT conditions for simplex projection (see, e.g., [65, §3]), it holds that there exists  
 734 unique  $\lambda$  such that

$$y^* = (y - \lambda \mathbf{1})_+.$$

735 Suppose there exists  $\lambda_1 < \lambda_2$  that satisfy (21). Then, since the left-hand side of (21), denoted as  
 736  $w(\lambda)$ , is monotone decreasing in  $\lambda$ , it must hold that  $w(\lambda) = 1$  for all  $\lambda \in [\lambda_1, \lambda_2]$ . In other words,  
 737  $w(\cdot)$  is *constant* on  $[w_1, w_2]$ . This further implies  $w(\lambda) = 0$  for all  $w \in [w_1, w_2]$ , a contradiction.  
 738 Therefore,  $\lambda = \phi_2(y)$  is uniquely defined. Let  $I^+(y)$ ,  $I^0(y)$ ,  $I^-(y)$  denote the set of indices  $i \in [n]$   
 739 such that  $y_i > \lambda$ ,  $y_i = \lambda$ ,  $y_i < \lambda$ , respectively (where  $\lambda = \phi_2(y)$ ). We have

$$\lambda = \frac{\sum_{i \in I^+(y)} y_i - 1}{|I^+(y)|} = \frac{\sum_{i \in I^+(y) \cup I^0(y)} y_i - 1}{|I^+(y)| + |I^0(y)|},$$

740 which is piecewise linear in  $y$  since there are only finitely many index possible sets of indices and  
 741  $I^+(y)$  is always nonempty (otherwise  $\sum_i (y_i - \lambda)_+ = 0$ ). To see Lipschitz continuity, let  $y'$  be  
 742 such that  $\|y' - y\|_1 \leq \epsilon$ , where  $0 < \epsilon < \min\{|y_i - y_j| : i, j \in [n], y_i \neq y_j\}$ . It must hold that  
 743  $I^+(y) \subseteq I^+(y')$ . In other words,  $\lambda' = \phi_2(y')$  does not deactivate any  $i \in I^+(y)$ , only bringing new  
 744  $i \in I^0(y)$ . Hence, it holds that  $|\lambda' - \lambda| \leq \frac{\|y - y'\|_1}{|I^+(y)|} \leq \|y - y'\|_1$ . In other words,  $\phi_2$  is 1-Lipschitz  
 745 continuous w.r.t.  $\|\cdot\|_1$ .

746 Finally, [65, Algorithm 1]) computes  $\lambda$  and  $y^*$  in  $O(n \log n)$  time.  $\square$

747 Slightly abusing the notation, let  $\phi_2$  also denote the mapping from  $x \in \mathbb{R}^{n \times m}$  to  $\lambda \in \mathbb{R}^m$ , that is,  
 748  $\lambda_j = \phi_2(x_{1j}, \dots, x_{nj})$ . Let

$$\phi(x) = \phi_2(\phi_1(x))/\gamma$$

749 and  $p^t = \phi(x^t)$ . Here,  $\phi_1$  is 2-Lipschitz continuous and  $\phi_2$  is 1-Lipschitz continuous w.r.t.  $\|\cdot\|_1$ .  
 750 For any optimal solution  $x^* \in \mathcal{X}^*$ , by  $x^* = \Pi_{\mathcal{X}}(x^*)$  and KKT conditions for (1) and (20), it can be  
 751 seen that

$$p^* = \phi(x^*).$$

752 Using the Lipschitz continuity properties of  $\phi_1$ ,  $\phi_2$  and Theorem 2 (properties ), we have

$$\begin{aligned} \|p^t - p^*\|_1 &= \|\phi(x^t) - \phi(\Pi_{\mathcal{X}^*}(x^t))\|_1 \leq \frac{1}{\gamma} \|\phi_1(x^t) - \phi_1(\Pi_{\mathcal{X}^*}(x^t))\|_1 \\ &\leq \frac{n}{\gamma} \|\phi_1(x^t) - \phi_1(\Pi_{\mathcal{X}^*}(x^t))\| \leq \frac{2n}{\gamma} \cdot \|x^t - \Pi_{\mathcal{X}^*}(x^t)\| \\ &\leq \frac{2n}{\gamma} \cdot \sqrt{\frac{2H_{\mathcal{X}}(A)}{\mu}} (f(x^t) - f^*) \\ &\leq \frac{2n}{\gamma} \sqrt{\frac{2H_{\mathcal{X}}(A)}{\mu}} \cdot \left(1 - \frac{\mu}{2HL\|A\|^2}\right)^{t/2} \cdot \sqrt{f(x^0) - f^*}. \end{aligned}$$

753 Therefore, we can take  $C = \frac{2n}{\gamma} \sqrt{\frac{2H_{\mathcal{X}}(A)}{\mu}} \cdot \sqrt{f(x^0) - f^*}$  and  $\rho = \sqrt{1 - \frac{\mu}{2HL\|A\|^2}} \in (0, 1)$ .

754 Since  $p^* \geq \underline{p} > 0$ , we can bound the maximum relative price error  $\eta^t = \max_j \frac{|p_j^t - p_j^*|}{p_j^*}$  as follows,  
 755 where  $\underline{p}_{\min} = \min_j \underline{p}_j$ .

$$\eta^t \leq \frac{\|p^t - p^*\|_1}{\underline{p}_{\min}} \leq \frac{C}{\underline{p}_{\min}} \cdot \rho^t.$$

## 756 C QL utilities

### 757 C.1 Derivation of the QL-Shmyrev convex program (4)

758 In [21, Lemma 5], the convex program for the equilibrium prices is as follows:

$$\min \sum_j p_j - \sum_i B_i \log \beta_i \quad \text{s.t. } v_{ij} \beta_i \leq p_j, \forall i, j, \quad 0 \leq \beta \leq 1. \quad (22)$$

759 Note that it is simply the dual of EG under linear utilities (20) with additional constraints  $\beta \leq 1$ .  
 760 Assuming  $v$  is nondegenerate, by a change of variable and Lagrange duality, we can derive the dual

of (22). First, at optimality, it must holds that  $\beta_i > 0$  for all  $i$ . Therefore, by nondegeneracy of  $v$ ,  $p_j > 0$  for all  $j$  at optimality. Let  $p_j = e^{q_j}$  and  $\beta_i = e^{-\gamma_i}$ . The above problem is equivalent to

$$\begin{aligned} \min \quad & \sum_j e^{q_j} + \sum_i B_i \gamma_i \\ \text{s.t.} \quad & q_j + \gamma_i \geq \log v_{ij}, \forall i, j, \\ & \gamma \geq 0. \end{aligned} \tag{23}$$

Let  $b_{ij} \geq 0$  be the dual variable associated with constraint  $q_j + \gamma_i \geq \log v_{ij}$ . The Lagrangian is

$$\begin{aligned} L(q, \gamma, b) &:= \sum_j e^{q_j} + \sum_i B_i \gamma_i - \sum_{i,j} b_{ij} (q_j + \gamma_i - \log v_{ij}) \\ &= \sum_j \left( e^{q_j} - \left( \sum_i b_{ij} \right) q_j \right) + \sum_i (B_i - \sum_j b_{ij}) \gamma_i + \sum_{i,j} (\log v_{ij}) b_{ij}. \end{aligned}$$

Clearly, when  $\sum_j b_{ij} \leq B_i$  for all  $i$ ,  $\gamma \geq 0$ ,  $L(q, \gamma, b)$  is minimized at  $q_j = \log \sum_i b_{ij}$  and  $\gamma = 0$ . When  $\sum_j b_{ij} > B_i$  for some  $i$ ,  $L \rightarrow -\infty$  as  $\gamma_i \rightarrow \infty$ . Therefore, when  $\sum_j b_{ij} \leq B_i$  for all  $i$ , we have

$$g(b) = \sum_j \left[ \sum_{i,j} b_{ij} - \left( \sum_i b_{ij} \right) \log \sum_i b_{ij} \right] + \sum_{i,j} (\log v_{ij}) b_{ij}.$$

Therefore, the dual is

$$\max g(b) \quad \text{s.t. } b \geq 0, \sum_j b_{ij} \leq B_i, \forall i.$$

Adding slack variables  $\delta = (\delta_1 \dots, \delta_n)$  and writing it in minimization form yield (4).

**Remark** When some  $v_{ij} = 0$  (but  $v$  is still nondegenerate), by the above derivation, the first summation in (4) should be replaced by  $\sum_{(i,j) \in \mathcal{E}}$ , where  $\mathcal{E} = \{(i, j) : v_{ij} > 0\}$ . The dual remains the same otherwise.

## C.2 Proof of Lemma 2

Similar to the proof of Lemma 11, this can be seen via the uniqueness of the optimal solution  $(p^*, \beta^*)$  of (22), that is, from uniqueness of  $\beta^*$  to that of  $p_j^* = \max_i v_{ij} \beta_i^*$ .

Let  $(b^*, \delta^*)$  be an optimal solution to (4). Note that strong duality holds for (23) and (4), since there exist simple strictly feasible solutions. By the derivation in Appendix C.1, it holds that  $q_j^* = \log \sum_i b_{ij}^*$  gives an optimal solution to (23) (the first-order optimality condition). Therefore,

$$p_j^* = e^{q_j^*} = \sum_i b_{ij}^*.$$

Next we establish the upper and lower bounds on  $p^*$ . By the derivation in Appendix C.1 and Lagrange duality, for any optimal solution  $b^*$  to (4), it holds that  $p_j^* := \sum_i b_{ij}^*$  and  $\beta_j^* = \min_{j \in J_i} \frac{p_j^*}{v_{ij}}$  give the (unique) optimal solution to (22). Clearly,  $\beta^* \leq 1$  and therefore

$$p_j^* = \max_i v_{ij} \beta_i^* \leq \max_i v_{ij} = \bar{p}_j.$$

By [21, Lemma 5], the dual of (22) is (c.f. the original EG primal 1)

$$\begin{aligned} \max_{u, x, s} \quad & \sum_i B_i \log u_i - s_i \\ \text{s.t.} \quad & u_i \leq v_i^\top x_i + s_i, \forall i, \\ & \sum_i x_{ij} \leq 1, \forall j, \\ & x, s \geq 0. \end{aligned} \tag{24}$$

Clearly, strong duality holds for (22) and (24). Furthermore, notice the following.

- $\beta_i^* = \frac{B_i}{u_i^*}$  at optimality, where  $u_i^*$  is the amount of utility of buyer  $i$ . This is by the stationarity condition in the KKT optimality conditions.
- $u_i^* \leq \|v_i\|_1 + B_i$ , where the right hand side is the amount of utility of all items and the entire budget. This can also be seen as follows. When  $s_i > B_i$ , decreasing  $s_i$  strictly increases the objective of (24). Therefore, the optimal  $s^*$  must satisfy  $s_i^* \leq B_i$ . It then follows from the constraint  $u_i \leq v_i^\top x_i + s_i$ .

Therefore,

$$p_j^* \geq \max_i v_{ij} \beta_i^* \geq \max_i \frac{v_{ij} B_i}{\|v_i\|_1 + B_i} = \underline{p}_j.$$

### C.3 Proof of Theorem 7

Similar to [8, Lemma 7], we first establish the following “generalized Lipschitz condition” for  $\varphi$ , which is key to the claimed last-iterate convergence.

**Lemma 14** For all  $(b, \delta), (b', \delta') \in \mathcal{B}$ , it holds that

$$\varphi(b') \leq \varphi(b) + \langle \nabla \varphi(b), b' - b \rangle + D(b', \delta' \| b, \delta). \quad (25)$$

Proof.

Recall that  $p_j(b) = \sum_i b_{ij}$ ,  $\frac{\partial}{\partial b_{ij}} \varphi(b) = \log \frac{p_j(b)}{v_{ij}}$ . For  $(a, \delta^a), (b, \delta^b) \in \mathcal{B}$ , we have

$$\begin{aligned} & \varphi(b) - \varphi(a) - \langle \nabla \varphi(a), b - a \rangle \\ &= - \sum_{i,j} (1 + \log v_{ij})(b_{ij} - a_{ij}) + \sum_j p_j(b) \log p_j(b) - \sum_j p_j(a) \log p_j(a) \\ & \quad - \sum_{i,j} (b_{ij} - a_{ij}) \log \frac{p_j(a)}{v_{ij}} \\ &= - \sum_{i,j} (b_{ij} - a_{ij}) + \sum_j p_j(b) \log \frac{p_j(b)}{p_j(a)} \\ &= \sum_i (\delta_i^b - \delta_i^a) + \sum_j p_j(b) \log \frac{p_j(b)}{p_j(a)}. \end{aligned} \quad (26)$$

Note that convexity and smoothness of  $x \mapsto x \log \frac{x}{y}$  ( $y > 0$ ) implies

$$\delta_i^b - \delta_i^a \leq \delta_i^b \log \frac{\delta_i^b}{\delta_i^a}. \quad (27)$$

Meanwhile, as in the proof of [8, Lemma 7], by convexity of  $q(x, y) = x \log \frac{x}{y}$ , it holds that

$$\sum_j p_j(b) \log \frac{p_j(b)}{p_j(a)} \leq \sum_{i,j} b_{ij} \log \frac{b_{ij}}{a_{ij}}. \quad (28)$$

By (27) and (28), the right hand side of (26) can be bounded by  $D(b, \delta^b \| a, \delta^a)$ . Therefore, (25) holds.  $\square$

Next, we prove the inequality on the right. Clearly,  $(b^0, \delta^0) \in \mathcal{B}$ . By [8, Theorem 3] (with objective  $f = \varphi$ , constraint set  $C = \mathcal{B}$  and stepsize  $\gamma$ ), we have

$$\varphi(b^t) - \varphi(b^*) \leq \frac{D(b^*, \delta^* \| b^0, \delta^0)}{t}.$$

Similar to the proof of [8, Lemma 13], we can bound the Bregman divergence on the right hand side as follows, where  $b_{ij} = \delta_i = \frac{B_i}{m+1}$ .

$$\begin{aligned} D(b^*, \delta^* \| b^0, \delta^0) &= \sum_{i,j} b_{ij}^* \log \frac{b_{ij}^*}{B_i} + \sum_i \delta_i^* \log \frac{\delta_i^*}{B_i} + \sum_{i,j} b_{ij}^* \log(m+1) + \sum_i \delta_i^* \log(m+1) \\ &\leq \sum_{i,j} b_{ij}^* \log(m+1) + \sum_i \delta_i^* \log(m+1) \\ &\leq \|B\|_1 \log(m+1), \end{aligned}$$

804 where the first inequality is because  $\frac{b_{ij}^*}{B_i} \leq 1$ . Combining the above yields the desired inequality.<sup>1</sup>

805 Finally, we show the inequality on the left. By optimality of  $(b^*, \delta^*)$ , we have

$$\langle \nabla \varphi(b^*), b - b^* \rangle \geq 0, \quad \forall (b, \delta) \in \mathcal{B}.$$

806 Recall that  $p_j(b) = \sum_i b_{ij}$ . By (26), we have

$$D(p^t \| p^*) = - \sum_{i,j} (b_{ij}^t - b_{ij}^*) + \sum_j p_j(b^t) \log \frac{p_j(b^t)}{p_j(b^*)} \leq \varphi(b^t) - \varphi^*.$$

807

□

#### 808 C.4 Details from MD (5) to PR (6)

809 Note that (5) is buyer-wise separable: for each  $i$ , we have (where  $\frac{\partial}{\partial b_{ij}} \varphi_b(b) = \log \frac{p_j(b)}{v_{ij}}$  and  
810  $\mathcal{B}_i = B_i \cdot \Delta_{m+1}$ )

$$\begin{aligned} (b_i^{t+1}, \delta_i^{t+1}) &= \arg \min_{(b_i, \delta_i) \in \mathcal{B}_i} \sum_j \left( \log \frac{p_j(b^t)}{v_{ij}} - \log b_{ij}^t \right) b_{ij} - (\log \delta_i^t) \delta_i + \sum_j b_{ij} \log b_{ij} + \delta_i \log \delta_i \\ &= \arg \min_{(b_i, \delta_i) \in \mathcal{B}_i} - \sum_j (\log b_{ij}^t) b_{ij} - (\log \delta_i^t) \delta_i + \sum_j b_{ij} \log b_{ij} + \delta_i \log \delta_i. \end{aligned} \quad (29)$$

811 By Lemma 6, for all  $i, j$ ,

$$b_{ij}^{t+1} = B_i \cdot \frac{\frac{v_{ij} b_{ij}^t}{p_j(b^t)}}{\sum_\ell \frac{v_{i\ell} b_{i\ell}^t}{p_\ell(b^t)} + \delta_i^t}, \quad \delta_i^{t+1} = B_i \cdot \frac{\delta_i^t}{\sum_\ell \frac{v_{i\ell} b_{i\ell}^t}{p_\ell(b^t)} + \delta_i^t}. \quad (30)$$

812 Let  $p_j^t = p_j(b^t)$ . Then, (30) can be written in terms of the allocations  $x_{ij}^t = b_{ij}^t / p_j^t$  (which sum up to  
813 1 over buyers  $i$  for any item  $j$ ) and leftover  $\delta_i^t$ , thus giving (6).

#### 814 C.5 Convergence of prices

815 Let  $\eta^t = \max_j \frac{|p_j^t - p_j^*|}{p_j^*}$  be the relative price error, which can clearly be bounded by  $\frac{\|p^t - p^*\|_1}{p_{\min}}$ , where  
816  $p_{\min} = \min_j p_j > 0$  is given in Lemma 2. By Theorem 7 and strong convexity of KL divergence  
817 (w.r.t.  $\|\cdot\|_1$ ), for  $b^t$  and  $p^t = p(b^t)$  generated by either PG or PR,

$$\frac{1}{2} \|p^t - p^*\|_1^2 \leq D(p^t \| p^*) \leq \varphi(b^t) - \varphi^*. \quad (31)$$

818 Therefore, for PG, the quantities  $\eta^t$ ,  $\|p^t - p^*\|$  and  $D(p^t \| p^*)$  all converge linearly to 0. For PR, they  
819 converge at  $O(1/T)$ .

820 We can further bound  $\varphi(b^t) - \varphi^*$  by the duality gap. Specifically, given  $b^t$ ,  $p^t = p(b^t)$ , let

$$b_i^t = \min \left\{ \min_j \frac{p_j^t}{v_{ij}}, 1 \right\}.$$

821 Then,  $(p^t, \beta^t)$  is feasible to (22). By weak duality,

$$\varphi(b^t) - \varphi^* \leq \varphi(b^t) + g(p^t, \beta^t), \quad (32)$$

822 where  $g(p, \beta)$  is the (minimization) objective of (22). Combining the above, we have

$$\eta^t \leq \frac{\sqrt{2(\varphi(b^t) + g(p^t, \beta^t))}}{p_{\min}}.$$

823 Note that the above holds for  $b^t$  from either PG or PR. Although neat in theory, numerical experiments  
824 suggest that the above bound can be loose and is not suitable as a termination criteria.

<sup>1</sup>In fact, the bound  $\log(mn)$  in [8, Lemma 13] (which assumes  $\|B\|_1 = 1$ ) can be easily strengthened to  $\log m$  via the above derivation. In other words, it does not depend explicitly on the number of buyers (but implicitly through  $\|B\|_1$  in general).

## 825 D Leontief utilities

### 826 D.1 Derivation of (7)

827 The primal EG (1) under Leontief utilities  $u_i(x_i) = \min_{j \in J_i} \frac{x_{ij}}{a_{ij}}$  can be written in both  $x$  and  $u$ :

$$\begin{aligned} \min_{u, x} \quad & - \sum_i B_i \log u_i \\ \text{s.t.} \quad & u_i \leq \frac{x_{ij}}{a_{ij}}, \forall j \in J_i, \forall i \in [n], \\ & \sum_i x_{ij} \leq 1, \forall j \in [m], \\ & x \geq 0, u \geq 0. \end{aligned}$$

828 Clearly, it can also be written in terms of  $u_i$  only as follows:

$$\min - \sum_i B_i \log u_i \quad \text{s.t.} \quad \sum_{i \in I_j} a_{ij} u_i \leq 1, \forall j, u \geq 0. \quad (33)$$

829 Let  $p_j \geq 0$  be the dual variable associated with constraint  $\sum_{i \in I_j} a_{ij} u_i \leq 1$ . The Lagrangian is

$$\begin{aligned} \mathcal{L}(u, p) &= - \sum_i B_i \log u_i + \sum_j p_j \left( \sum_{i \in I_j} a_{ij} u_i - 1 \right) \\ &= - \sum_j p_j + \sum_i [-B_i \log u_i + \langle a_i, p \rangle u_i]. \end{aligned}$$

830 Note that minimizing  $\mathcal{L}$  w.r.t.  $u$  can be performed separately for each  $u_i$ . For any  $i$  such that  
831  $\sum_{j \in J_i} p_j > 0$ , by first-order stationarity condition, the term  $-B_i \log u_i + \langle a_i, p \rangle u_i$  is minimized  
832 at  $u_i^*(p) = \frac{B_i}{\langle a_i, p \rangle}$  with minimum value  $B_i(1 - \log B_i) + B_i \log \langle a_i, p \rangle$ . If  $\sum_{j \in J_i} p_j = 0$ , the term  
833 approaches  $-\infty$  as  $u_i \rightarrow \infty$ . Therefore, the dual objective is

$$g(p) = \begin{cases} - \sum_j p_j + \sum_i B_i \log \langle a_i, p \rangle + \sum_i B_i(1 - \log B_i) & \text{if } p \geq 0 \text{ and } \sum_{j \in J_i} a_{ij} p_j > 0 \\ -\infty & \text{o.w.} \end{cases}$$

834 Hence the (Lagrangian) dual problem is  $\max_p g(p)$ . Its minimization form, up to the constant  
835  $-\sum_i B_i(1 - \log B_i)$ , is

$$\min \left[ \sum_j p_j - \sum_i B_i \log \langle a_i, p \rangle \right] \quad \text{s.t. } p \geq 0. \quad (34)$$

836 By Theorem 1, we have the following.

- 837 • An optimal solution to (34) gives equilibrium prices.
- 838 • A market equilibrium  $(x^*, p^*)$  satisfies  $\langle p^*, x_i \rangle = B_i$  for all  $i$  and  $\sum_i x_{ij}^* = 1$  for all  $j$ .  
839 Therefore, we have  $\sum_j p_j^* = \|B\|_1$ .

840 Therefore, we can add the constraint  $\sum_j p_j = \|B\|_1$  to (34) without affecting any optimal (equilib-  
841 rium) solution. This leads to (7).

### 842 D.2 Proof of Lemma 3

843 let  $p$  be any feasible solution to (7). Since  $\sum_j p_j = \|B\|_1$ , we have  $\langle a_i, p \rangle \leq \|a_i\|_\infty \|p\|_1 =$   
844  $\|a_i\|_\infty \|B\|_1$  for all  $i$ . Meanwhile, by Appendix D.1, at equilibrium,  $p^*$  and primal variables  $u_i^*$  satisfy  
845  $u_i^* = \frac{B_i}{\langle a_i, p^* \rangle}$  (by stationarity) and  $u_i^* \leq$  utility of getting one unit of every item  $= \min_{j \in J_i} \frac{1}{a_{ij}} =$   
846  $\frac{1}{\|a_i\|_\infty}$  for all  $i$ . Therefore  $\langle a_i, p^* \rangle = \frac{B_i}{u_i^*} \leq \|a_i\|_\infty \|B\|_1$ .

### 847 D.3 Linear convergence of utilities

848 Note that the equilibrium utilities  $u^*$  are clearly unique by (33). By the KKT stationary condition,

$$u_i^* = \frac{B_i}{\langle a_i, p^* \rangle}, \quad \forall i$$

849 for equilibrium prices  $p^*$ . Therefore, an intuitive construction of  $u^t$  is as follows. Let  $p^t$  be the current  
850 iterate,  $r_i^t = \langle a_i, p^t \rangle$ . First compute  $\tilde{u}_i^t = \frac{B_i}{r_i^t}$ . Then, to satisfy the primal constraints  $\sum_i u_i a_{ij} \leq 1$ ,  
851 take

$$u^t = \frac{\tilde{u}^t}{\max_j \sum_i u_i a_{ij}} = \frac{\tilde{u}^t}{\|a^\top \tilde{u}\|_\infty}.$$

852 Let  $r^* = \langle a_i, p^* \rangle = \frac{B_i}{u_i^*}$  and  $f^* = \arg \min_{p \in \mathcal{P}} \tilde{h}(ap) = \tilde{h}(r^*) = h(r^*)$ . Strong convexity of  $\tilde{h}$   
853 implies  $\frac{\mu}{2} \|r^t - r^*\|^2 \leq \tilde{h}(r^t) - f^*$ . Furthermore, the mapping  $r^t \mapsto \tilde{u}^t \mapsto u^t$  is Lipschitz continuous  
854 on  $r^t \in [\underline{r}, \bar{r}]$ . Therefore,  $\|u^t - u^*\|$  converges to 0 linearly as well.

## 855 E Additional details on numerical experiments

856 For linear utilities, we generate market data  $v = (v_{ij})$  where  $v_{ij}$  are i.i.d. from standard Gaussian,  
857 uniform, exponential, or lognormal distribution. For each of the sizes  $n = 50, 100, 150, 200$  (on  
858 the horizontal axis) and  $m = 2n$ , we generate 30 instances with unit budgets  $B_i = 1$  and random  
859 budgets  $B_i = 0.5 + \tilde{B}_i$  (where  $\tilde{B}_i$  follows the same distribution as  $v_{ij}$ ). See §6 for plots under  
860 random budgets and below for those under uniform budgets.

861 The termination conditions (on the vertical axis) are

$$\epsilon(p^t, p^*) \leq \eta, \quad \eta = 10^{-2}, 10^{-3},$$

862 where  $p^*$  is the optimal Lagrange multipliers of (1) computed by CVXPY+Mosek. Then, for  
863  $n = 100, 200, 300, 400$  and  $n = 2m$ , we repeat the above with termination conditions

$$\text{dgap}_t/n \leq \eta, \quad \eta = 10^{-3}, 10^{-4}, 10^{-5}, 5 \times 10^{-6}.$$

864 For QL utilities, we repeat the above (same random  $v$ , same sizes and termination conditions) using  
865 budgets  $B_i = 5(1 + \tilde{B}_i)$ . This is to make buyers have nonzero bids and leftovers (i.e.,  $0 < \delta_i^* < B_i$ )  
866 at equilibrium in most scenarios. In this case,  $p^* = p(b^*)$ , where  $b^*$  is the optimal solution to (4)  
867 computed by CVXPY+Mosek. For QL, FW does not perform well in initial trials and is excluded in  
868 subsequent experiments.

869 For the linesearch subroutine  $\mathcal{LS}_{\alpha, \beta, \Gamma}$  in PG (see Appendix A.5), we use parameters  $\alpha = 1.02$ ,  
870  $\beta = 0.8$  and  $\Gamma = 100L\|A\|^2$  throughout.

871 For Leontief utilities, in addition to  $\text{dgap}_t/n \leq \eta$ , we also use the termination condition  $\epsilon(u^t, u^*) =$   
872  $\max_j \frac{|u_j^t - u_j^*|}{u_j^*} \leq \eta$ , where  $u^*$  is the optimal solution to EG under Leontief utilities (33) computed by  
873 CVXPY+Mosek.

874 **Computing the duality gap** For linear utilities, the objective of the original Shmyrev's convex  
875 program (19) is

$$\varphi(b) = - \sum_{i,j} (\log v_{ij}) b_{ij} + \sum_j p_j(b) \log p_j(b)$$

876 where  $p_j(b) = \sum_i b_{ij}$ . Recall the objective of the (EG) dual (20), equivalent to the dual of Shmyrev's  
877 (19),

$$g(p, \beta) = \sum_j p_j - \sum_i B_i \log \beta_i.$$

878 Given iterate  $b^t$ , let  $p_j^t = p_j(b^t)$  and  $\beta_i^t = \min_j \frac{p_j}{v_{ij}}$ , which is finite since  $v$  is nondegenerate and  
879  $p^t > 0$ . The duality gap is computed via

$$\text{dgap}_t = \varphi(b^t) + g(p^t, \beta^t).$$

880 For QL utilities, it is computed similarly, that is, through (32). For Leontief utilities, it is computed  
881 using the construction in Appendix D.3.

882 **Additional plots** In §6, the plots for linear utilities are generated under random  $B_i$ . Here we  
883 present an augmented set of plots under different utilities, unit and random budgets  $B_i$  and different  
884 termination conditions ( $\text{dgap}_t/n \leq \eta$  or  $\epsilon(p^t, p^*) \leq \eta$ ). The legends are in the subplot [Linear  
885 utilities,  $\text{dgap}/n \leq 1e-3$ ].

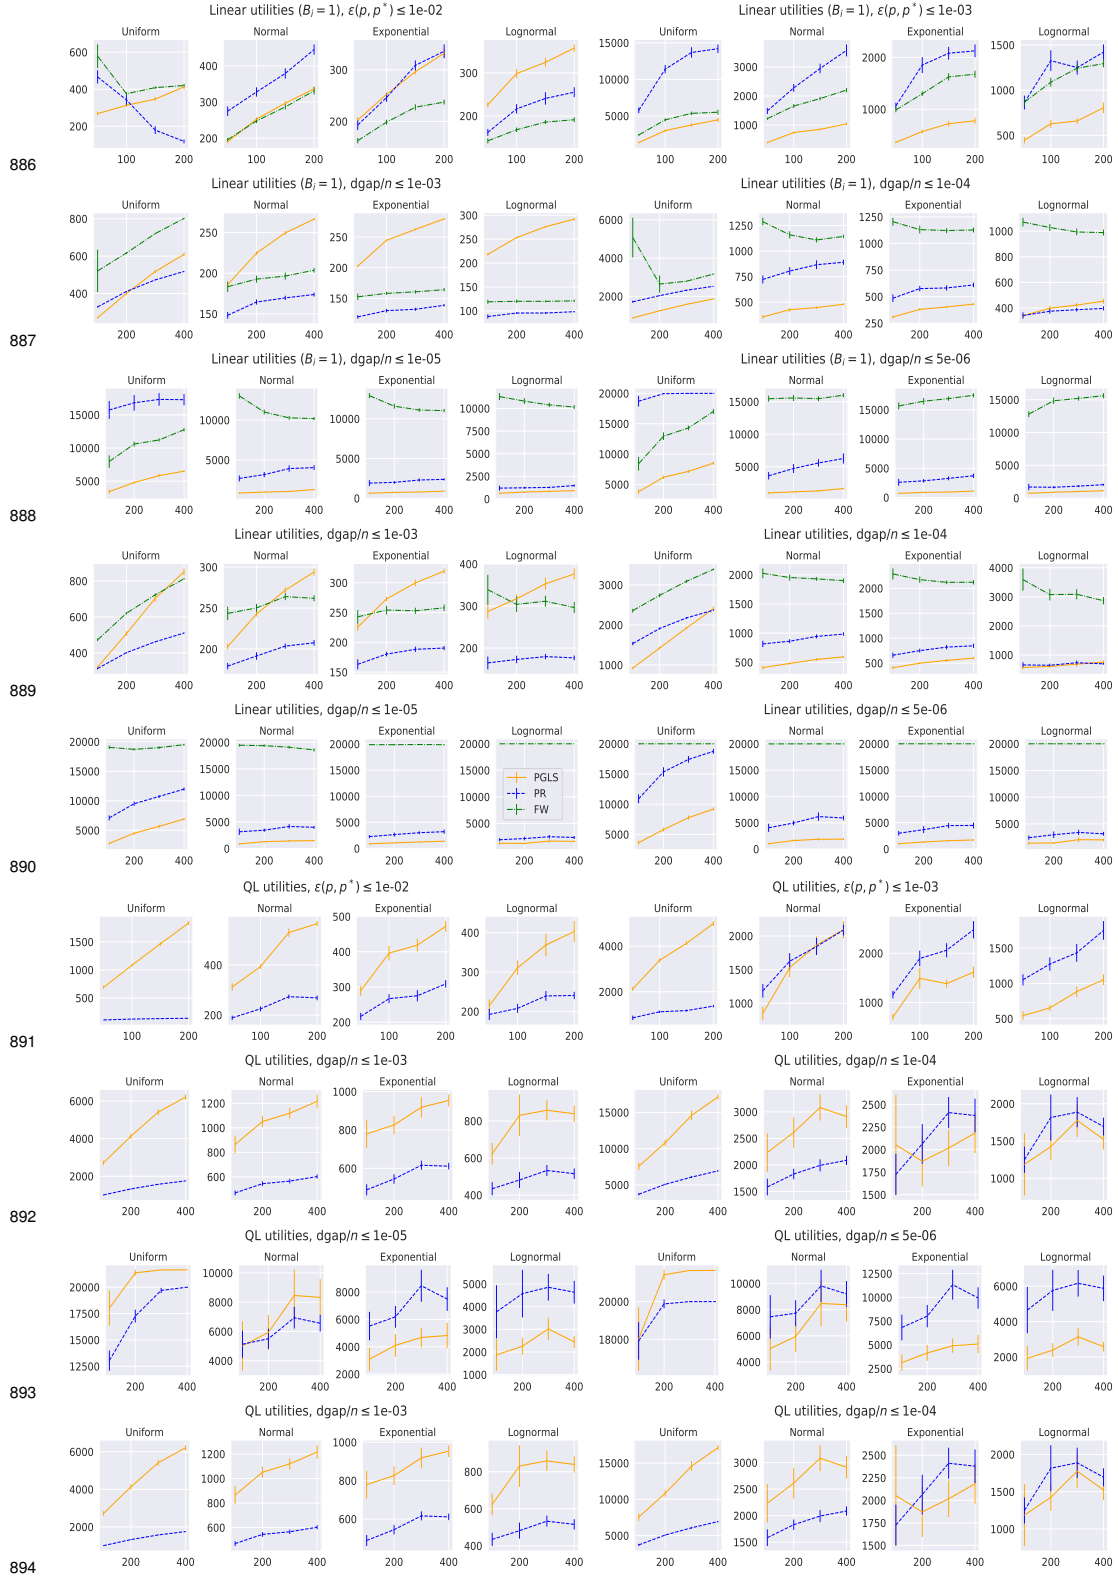

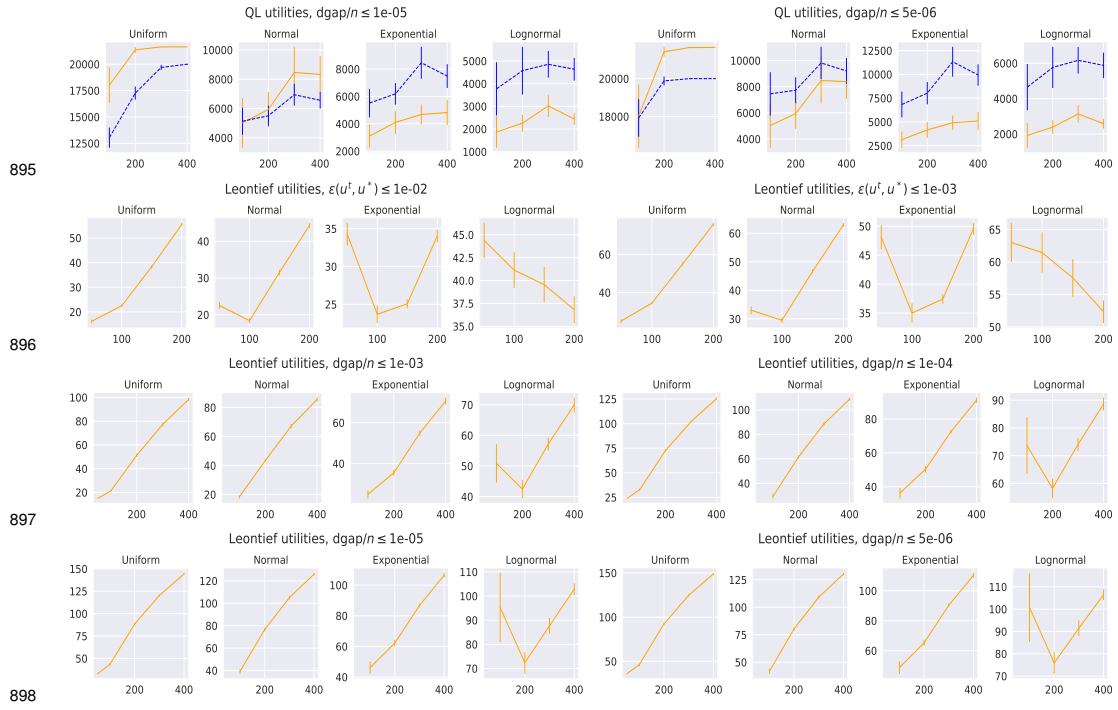

Supplement: Supplementary file [file f75526659f31040afeb61cb7133e4e6d-Supplemental.zip]
